# Supplementary material
Source: publisher figshare collection journal article supplement (https://diabetesjournals.figshare.com/ndownloader/files/22165674)
Supplement: Supplementary file 1 [file 22165674]

**Supplementary Figure 1** Associations of genetic liability to adult type 2 diabetes with metabolic traits at different early life stages among a complete-case sample (N=699)


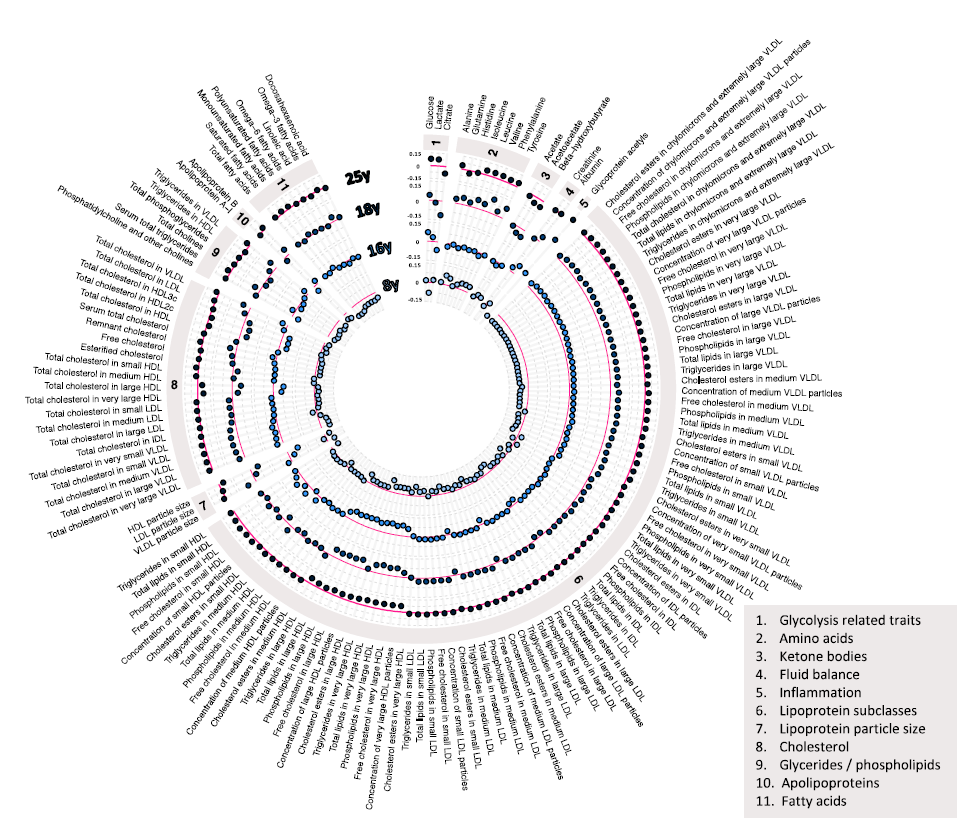


Estimates shown are beta coefficients representing SD difference in metabolic trait per SD higher GRS for type 2 diabetes, ordered concentrically (inner circle to outer circle) by increasing age at measurement. Six metabolic traits were not measured at the 25y time point: diacylglycerol, ratio of diacylglycerol to triglycerides, fatty acid chain length, degree of unsaturation, conjugated linoleic acid, and ratio of conjugated linoleic acid to total fatty acids.
